# Supplementary material for: CircTM7SF3 contributes to oxidized low-density lipoprotein-induced apoptosis, inflammation and oxidative stress through targeting miR-206/ASPH axis in atherosclerosis cell model in vitro
Source: Springer Nature journal article supplement (doi:10.1186/s12872-020-01800-x), 2021-02-02
Supplement: MOESM2 [file 18826022]

Figure 5. ASPH is a direct target of miR-206 in THP-1 cells

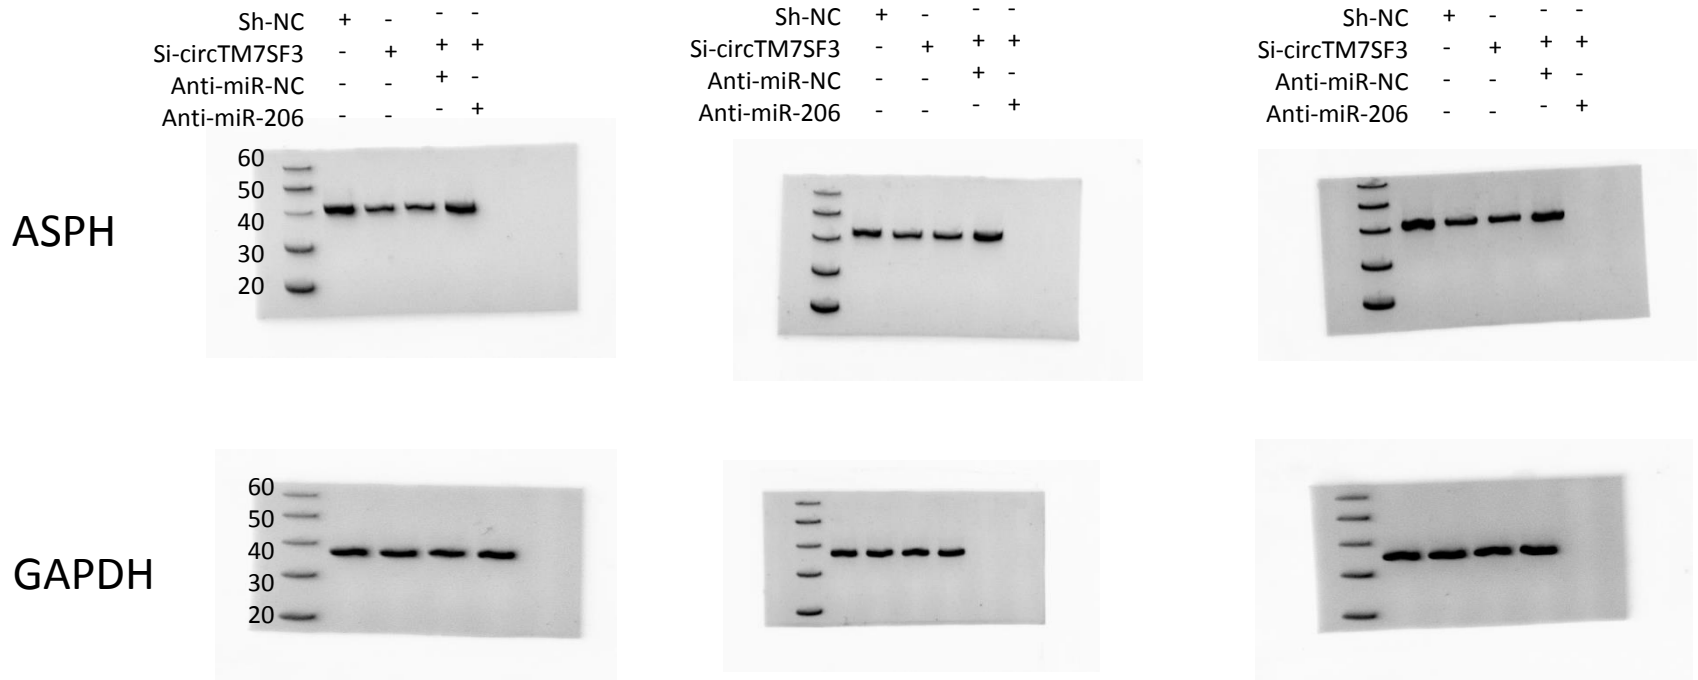

(L) THP-1 cells were treated with si-NC, si-circTM7SF3, si-circTM7SF3 + anti-miR-NC or si-circTM7SF3 + anti-miR-206. The mRNA and protein abundance of ASPH in THP-1 cells was detected by Western blot assay.

Figure 6. MiR-206 overexpression-mediated influences in ox-LDL-induced THP-1 cells are partly overturned by ASPH accumulation .

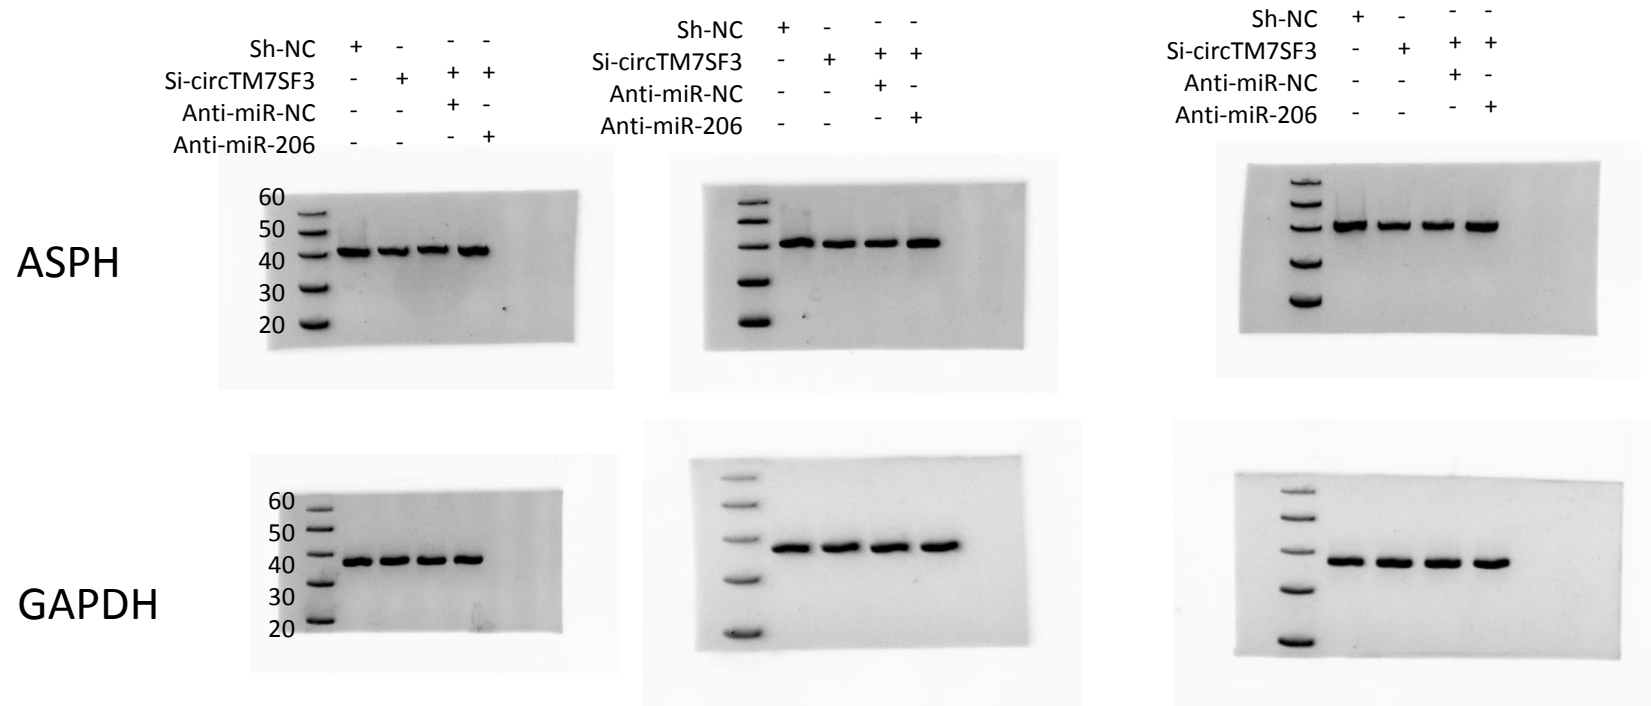

(B) THP-1 cells were transfected with miR-NC, miR-206, miR-206 + pcDNA-NC or miR-206 + pcDNA-ASPH. Western blot assay were used to detect the mRNA and protein expression of ASPH.
